# Supplementary material
Source: HighWire-hosted journal article supplement (http://www.jrheum.org/highwire/filestream/36383/field_highwire_adjunct_files/0/190236DataSuppl.pdf)
Supplement: 190236DataSuppl.pdf [file 190236DataSuppl.pdf]

ONLINE SUPPLEMENTARY DATA.

**Supplementary Table 1: Cancer Categories**

| <b>Cancer Categories</b>                    | <b>ICD7</b> | <b>ICD10</b>       |
|---------------------------------------------|-------------|--------------------|
| Upper GI tract                              | 140–152     | C00.0 - C17.9      |
| Lower GI tract                              | 153–154     | C18 - C21.8        |
| Liver, Gallbladder, Pancreas,<br>Peritoneum | 155–158     | C22-C26,<br>C48.2  |
| Respiratory                                 | 160–164     | C30-C39            |
| Breast                                      | 170         | C50-C58            |
| Female Reproductive system                  | 171–175     | C51-C58            |
| Prostate                                    | 177         | C61                |
| Male Reproductive system                    | 178–179     | C60, C62-C63       |
| Kidneys and renal pelvis                    | 180         | C64-C65            |
| Urinary tract without kidneys               | 181         | C66-C68            |
| Skin                                        | 190–191     | C43-C44            |
| Eyes                                        | 192         | C69                |
| Central and Peripheral Nervous<br>System    | 193         | C70-72             |
| Endocrine system                            | 194–195     | C73-C75            |
| Sarcomas                                    | 196–197     | C40-41, C45-<br>49 |
| Unspecified                                 | 199         | C76-C80            |
| Lymphomas                                   | 200–202     | C81-C88            |
| Multiple Myeloma                            | 203         | C90-C90.2          |
| Leukemia exclusive myelofibrosis            | 204–208     | C91-C95            |
| Myelofibrosis                               | 209         | C94.4              |

**Supplementary Table 2: Cancer sites and delay between cancer cases in 25 patients with cancer both before and after the GCA diagnosis**

| Sex | Cancer Cases Before | Cancer Cases After | Cancer-site Before GCA and year           | Cancer-Site After GCA and year | Reoccurrence Delay in years |
|-----|---------------------|--------------------|-------------------------------------------|--------------------------------|-----------------------------|
| M   | 1                   | 2                  | Skin 1992                                 | Prostate 2010 and Skin 2010    | 18                          |
| F   | 1                   | 1                  | Lower GIT 1995                            | Skin 2010                      | 15                          |
| M   | 1                   | 1                  | Male reproductive system 1971             | Prostate 2010                  | 39                          |
| F   | 1                   | 1                  | Female reproductive system 1968           | Urinary tract 2000             | 32                          |
| F   | 1                   | 1                  | Skin 1997                                 | Skin 2011                      | 14                          |
| F   | 1                   | 1                  | Female reproductive system 1978           | Breast 2011                    | 33                          |
| F   | 2                   | 1                  | Skin 1978 and 1993                        | Skin 2012                      | 19                          |
| F   | 1                   | 1                  | Female reproductive and Lower GIT 1991    | Lower GIT 2000                 | 9                           |
| F   | 1                   | 1                  | Female reproductive system 1967           | Lower GIT 2009                 | 42                          |
| M   | 3                   | 1                  | Myelofibrosis 2000(x2) and Lower GIT 2005 | Skin 2010                      | 5                           |
| M   | 1                   | 2                  | Leukemia 1994                             | Skin 2004 and Lymphoma 2007    | 10                          |
| M   | 1                   | 1                  | Lower GIT 1998                            | Leukemia 2005                  | 7                           |
| F   | 1                   | 1                  | Lower GIT 1998                            | Respiratory 2008               | 10                          |
| F   | 1                   | 1                  | Lower GIT 1964                            | Breast 2008                    | 44                          |
| F   | 1                   | 1                  | Breast 1992                               | Skin 2010                      | 18                          |
| M   | 2                   | 1                  | Lower and Upper GIT 1995                  | Lower GIT 2011                 | 16                          |
| F   | 1                   | 1                  | Female reproductive system 1967           | Breast 2007                    | 40                          |
| M   | 1                   | 1                  | Prostate 1999                             | Kidneys 2005                   | 6                           |
| M   | 1                   | 1                  | Prostate 1992                             | Skin 2009                      | 17                          |
| F   | 1                   | 1                  | Female reproductive system 1968           | Lower GIT 2010                 | 42                          |
| F   | 1                   | 1                  | Female reproductive system 1999           | Leukemia 2010                  | 11                          |
| F   | 1                   | 1                  | Lower GIT 2000                            | Skin 2007                      | 7                           |
| M   | 1                   | 2                  | Prostate 2003                             | Lower GIT 2005 and Skin 2012   | 2                           |
| F   | 1                   | 1                  | Female reproductive system 1975           | Breast 2001                    | 26                          |
| F   | 1                   | 1                  | Kidneys 1982                              | Skin 1999                      | 17                          |

GIT: Gastrointestinal tract

The mean delay from the last cancer occurred before the GCA diagnosis to the first cancer occurred after the GCA diagnosis was 19,96 years with a standard deviation 13,30 years. The median was 17 years with IQR 10-34 years.

**Supplementary Table 3: Malignancies prior to GCA diagnosis in descending order**

| <b>Cancer Categories</b>          | <b>Frequency</b> | <b>Percent</b> |
|-----------------------------------|------------------|----------------|
| Female Reproductive system        | 47               | 25             |
| Skin (without BC cancer)          | 34               | 18,1           |
| Breast                            | 28               | 14,9           |
| Lower Gastrointestinal tract      | 23               | 12,2           |
| Prostate                          | 14               | 7,4            |
| Urinary tract without the kidneys | 10               | 5,3            |
| Upper Gastrointestinal tract      | 8                | 4,3            |
| Kidneys and renal pelvis          | 6                | 3,2            |
| Endocrine system                  | 6                | 3,2            |
| CNS                               | 3                | 1,6            |
| Respiratory system                | 2                | 1,1            |
| Male Reproductive system          | 2                | 1,1            |
| Multiple Myeloma                  | 2                | 1,1            |
| Leukemia                          | 2                | 1,1            |
| Myelofibrosis                     | 1                | 0,5            |
| <b>Total</b>                      | <b>188</b>       | <b>100</b>     |

### Supplementary Figure 1

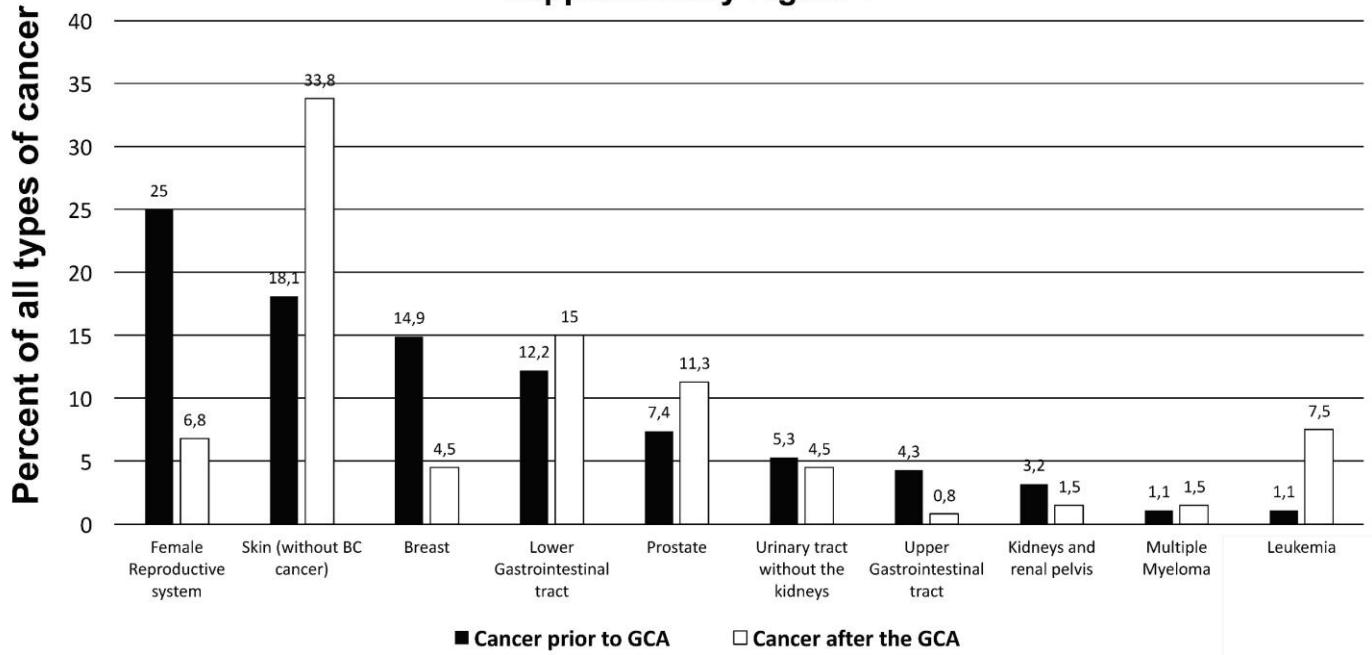

### Supplementary Figure 2

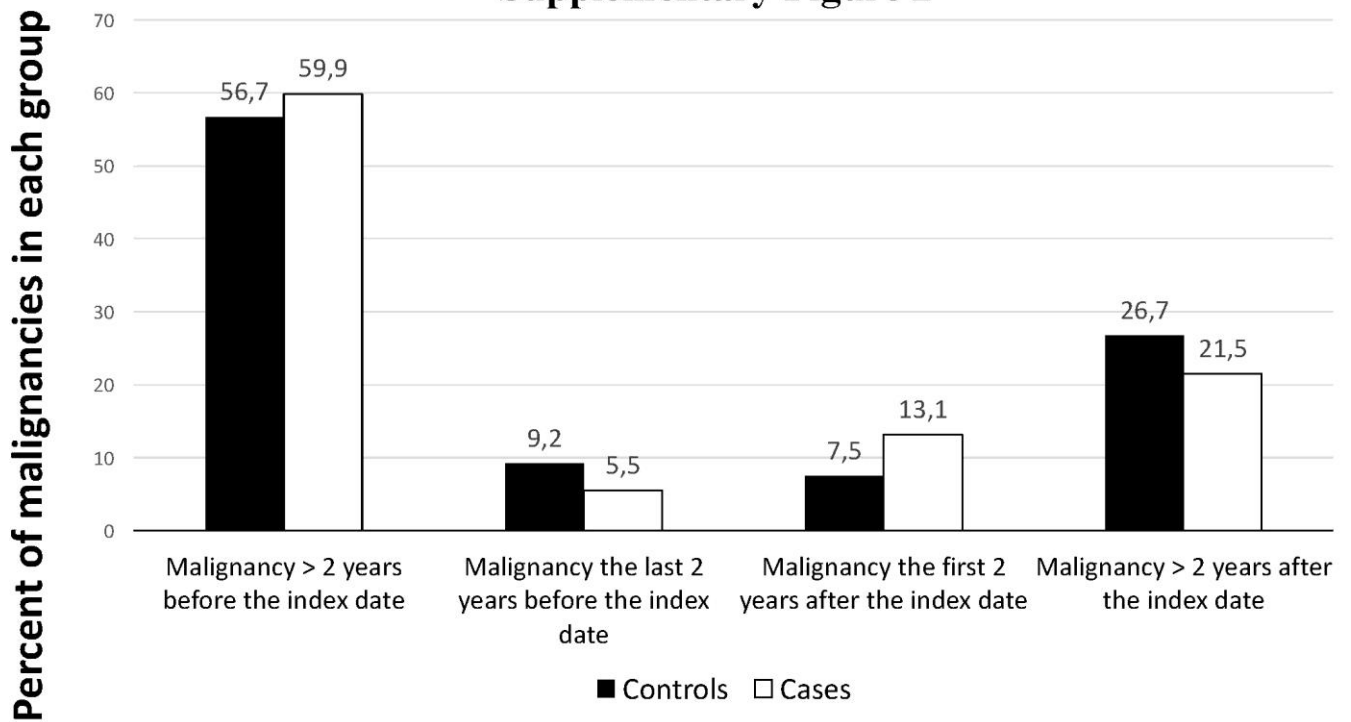

Time periods when malignancy occurred in relation to index date
